# Supplementary material for: Mid-Holocene Intertropical Convergence Zone migration: connection with Hadley cell dynamics and impacts on terrestrial hydroclimate
Source: Copernicus journal article supplement (doi:10.5194/cp-21-1209-2025), 2025-07-14
Supplement: Supplementary file 1 [file cp-21-1209-2025-supplement.pdf]

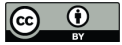

*Supplement of*

**Mid-Holocene Intertropical Convergence Zone migration: connection with Hadley cell dynamics and impacts on terrestrial hydroclimate**

**Jianpu Bian et al.**

*Correspondence to:* Jianpu Bian ([bian.jianpu@helsinki.fi](mailto:bian.jianpu@helsinki.fi))

The copyright of individual parts of the supplement might differ from the article licence.

**Table S1.** Annual precipitation (unit: mm/year) difference between the MH and PI from the pollen proxy dataset adapted from Herbert and Harrison (2016) and Lowry and McGowan (2024). SE denotes the pooled standard error.

| Latitude(°) | Longitude(°) | MAP      | SE      |
|-------------|--------------|----------|---------|
| -43         | 145          | 33.9     | ±316.12 |
| -43         | 147          | 488.81   | ±400.77 |
| -43         | 149          | 340.52   | ±337.83 |
| -41         | 145          | -192.24  | ±362.11 |
| -41         | 147          | -134.7   | ±351.44 |
| -39         | 141          | -1.39    | ±345.53 |
| -39         | 143          | 127.76   | ±320.8  |
| -39         | 145          | -34.94   | ±332.51 |
| -39         | 147          | 648.35   | ±589.47 |
| -37         | 141          | 344.4    | ±314.35 |
| -37         | 143          | 435.95   | ±350.25 |
| -37         | 145          | 733.33   | ±310.24 |
| -37         | 147          | 347.46   | ±387.13 |
| -37         | 149          | 236.91   | ±338.02 |
| -37         | 151          | -118.95  | ±294.92 |
| -35         | 115          | 94.1     | ±405.65 |
| -35         | 117          | 360.51   | ±361.18 |
| -35         | 119          | 145.4    | ±315.22 |
| -35         | 139          | 337.95   | ±409.06 |
| -35         | 143          | -6.69    | ±294.87 |
| -35         | 149          | 218.66   | ±346.99 |
| -35         | 151          | 92.32    | ±304.07 |
| -33         | 115          | 149.26   | ±354.93 |
| -33         | 141          | 350.91   | ±300.04 |
| -33         | 151          | 329.92   | ±315.23 |
| -31         | 115          | 974.56   | ±323.65 |
| -31         | 127          | 366.88   | ±330.12 |
| -31         | 139          | 227.16   | ±334.44 |
| -31         | 143          | 9.63     | ±295.29 |
| -31         | 151          | 529.72   | ±328.49 |
| -27         | 153          | -100.25  | ±412.28 |
| -25         | 153          | -35.77   | ±320.7  |
| -17         | 127          | 105.82   | ±300.74 |
| -17         | 145          | 896.86   | ±476.2  |
| -17         | 147          | -2065.91 | ±630.63 |
| -15         | 127          | 746.57   | ±357.96 |
| -15         | 137          | 298.54   | ±298.73 |
| -15         | 145          | 137.11   | ±319.76 |
| -13         | 137          | 37.03    | ±334.55 |
| -13         | 141          | -789.8   | ±330.85 |
| -13         | 143          | 8.88     | ±363.29 |
| -11         | 143          | -22.07   | ±334.56 |

**Table S2.** Alpha index difference between the MH and PI from the pollen proxy dataset adapted from Herbert and Harrison (2016) and Lowry and McGowan (2024). SE denotes the pooled standard error.

| Latitude(°) | Longitude(°) | Alpha   | SE      |
|-------------|--------------|---------|---------|
| -43         | 145          | 0       | ±0.0971 |
| -43         | 147          | 0.0265  | ±0.102  |
| -43         | 149          | 0.0152  | ±0.1098 |
| -41         | 145          | -0.1337 | ±0.0983 |
| -41         | 147          | -0.1781 | ±0.1527 |
| -39         | 141          | -0.0532 | ±0.1302 |
| -39         | 143          | 0.0414  | ±0.1116 |
| -39         | 145          | -0.0495 | ±0.1451 |
| -39         | 147          | -0.0145 | ±0.1072 |
| -37         | 141          | 0.2339  | ±0.1195 |
| -37         | 143          | 0.0931  | ±0.14   |
| -37         | 145          | 0.2544  | ±0.1102 |
| -37         | 147          | 0.065   | ±0.129  |
| -37         | 149          | -0.017  | ±0.1211 |
| -37         | 151          | -0.1508 | ±0.0984 |
| -35         | 115          | 0.1778  | ±0.1646 |
| -35         | 117          | 0.2084  | ±0.1407 |
| -35         | 119          | 0.1549  | ±0.1452 |
| -35         | 139          | 0.2376  | ±0.1469 |
| -35         | 143          | -0.0034 | ±0.0971 |
| -35         | 149          | -0.0315 | ±0.1181 |
| -35         | 151          | 0.0283  | ±0.109  |
| -33         | 115          | 0.1347  | ±0.1438 |
| -33         | 141          | 0.5122  | ±0.1006 |
| -33         | 151          | 0.1332  | ±0.1018 |
| -31         | 115          | 0.3877  | ±0.1244 |
| -31         | 127          | 0.3249  | ±0.1703 |
| -31         | 139          | 0.1824  | ±0.1683 |
| -31         | 143          | 0.0089  | ±0.0987 |
| -31         | 151          | 0.2113  | ±0.1127 |
| -27         | 153          | -0.0817 | ±0.1585 |
| -25         | 153          | 0.0299  | ±0.1049 |
| -17         | 127          | 0.2538  | ±0.1376 |
| -17         | 145          | 0.2457  | ±0.1148 |
| -17         | 147          | -0.2435 | ±0.1209 |
| -15         | 127          | 0.349   | ±0.114  |
| -15         | 137          | 0.3037  | ±0.156  |
| -15         | 145          | 0.0228  | ±0.106  |
| -13         | 137          | 0.0786  | ±0.1244 |
| -13         | 141          | 0.2548  | ±0.1142 |
| -13         | 143          | 0.0401  | ±0.117  |
| -11         | 143          | 0.0486  | ±0.1153 |

## References

Herbert, A. V. and Harrison, S. P.: Evaluation of a modern-analogue methodology for reconstructing Australian palaeoclimate from pollen, *Review of Palaeobotany and Palynology*, 226, 65–77, 2016.

Lowry, A. L. and McGowan, H. A.: Insights into the Australian mid-Holocene climate using downscaled climate models, *Climate of the Past*, 20, 2309–2325, 2024.
